# Supplementary material for: Lithium storage performance enhanced by lithiation-induced structural phase transitions of fluorinated MXenes
Source: Royal Society of Chemistry journal article supplement (doi:10.1039/d3cp00974b), 2023-01-01
Supplement: d3cp00974b2.pdf [file d3cp00974b2.pdf]

Table S1. Calculated total energies ( $E_{\text{tot}}$ ), energy differences ( $\Delta E_{\text{tot}}$ ) of HCP and FCC models, lattice parameters ( $a$ ), slab thicknesses ( $L$ ), M-C bond lengths ( $d_{\text{M-C}}$ ), M-F bond lengths ( $d_{\text{M-F}}$ ) of different  $\text{M}_2\text{CF}_2$  configurations.

| $\text{M}_2\text{CF}_2$  | F sites | $E_{\text{tot}}$<br>(eV/atom) | $\Delta E_{\text{tot}}$<br>(eV/atom) | $a$ (Å) | $L$ (Å) | $d_{\text{M-C}}$ (Å) | $d_{\text{M-F}}$ (Å) |
|--------------------------|---------|-------------------------------|--------------------------------------|---------|---------|----------------------|----------------------|
| $\text{Sc}_2\text{CF}_2$ | HCP     | -7.434                        |                                      | 6.389   | 5.227   | 2.268                | 2.253                |
| $\text{Sc}_2\text{CF}_2$ | FCC     | -7.679                        | -0.245                               | 6.531   | 4.832   | 2.274                | 2.206                |
| $\text{Sc}_2\text{CF}_2$ | TOP     | -7.106                        |                                      | 6.965   | 6.049   | 2.340                | 1.827                |
| $\text{Y}_2\text{CF}_2$  | HCP     | -7.574                        |                                      | 6.907   | 5.526   | 2.447                | 2.405                |
| $\text{Y}_2\text{CF}_2$  | FCC     | -7.778                        | -0.203                               | 7.079   | 5.104   | 2.461                | 2.360                |
| $\text{Y}_2\text{CF}_2$  | TOP     | -7.130                        |                                      | 7.509   | 6.554   | 2.533                | 1.966                |
| $\text{Ti}_2\text{CF}_2$ | HCP     | -7.966                        |                                      | 5.945   | 5.072   | 2.100                | 2.170                |
| $\text{Ti}_2\text{CF}_2$ | FCC     | -8.083                        | -0.117                               | 6.101   | 4.782   | 2.098                | 2.160                |
| $\text{Ti}_2\text{CF}_2$ | TOP     | -7.744                        |                                      | 6.392   | 5.738   | 2.146                | 1.77                 |
| $\text{Zr}_2\text{CF}_2$ | HCP     | -8.414                        |                                      | 6.459   | 5.409   | 2.277                | 2.330                |
| $\text{Zr}_2\text{CF}_2$ | FCC     | -8.481                        | -0.067                               | 6.597   | 5.139   | 2.273                | 2.322                |
| $\text{Zr}_2\text{CF}_2$ | TOP     | -8.085                        |                                      | 6.788   | 6.364   | 2.334                | 1.914                |
| $\text{Hf}_2\text{CF}_2$ | HCP     | -10.260                       |                                      | 6.316   | 5.411   | 2.236                | 2.305                |
| $\text{Hf}_2\text{CF}_2$ | FCC     | -10.321                       | -0.062                               | 6.534   | 5.055   | 2.233                | 2.310                |
| $\text{Hf}_2\text{CF}_2$ | TOP     | -10.010                       |                                      | 6.798   | 6.285   | 2.324                | 1.897                |
| $\text{V}_2\text{CF}_2$  | HCP     | -7.945                        |                                      | 5.574   | 5.143   | 2.038                | 2.082                |
| $\text{V}_2\text{CF}_2$  | FCC     | -8.015                        | -0.069                               | 5.962   | 4.601   | 2.001                | 2.145                |
| $\text{V}_2\text{CF}_2$  | TOP     | -7.833                        |                                      | 6.338   | 5.312   | 2.043                | 1.748                |
| $\text{Nb}_2\text{CF}_2$ | HCP     | -8.565                        |                                      | 6.004   | 5.523   | 2.195                | 2.237                |
| $\text{Nb}_2\text{CF}_2$ | FCC     | -8.602                        | -0.037                               | 6.412   | 4.936   | 2.153                | 2.302                |
| $\text{Nb}_2\text{CF}_2$ | TOP     | -8.364                        |                                      | 6.342   | 6.223   | 2.208                | 1.876                |
| $\text{Ta}_2\text{CF}_2$ | HCP     | -9.271                        |                                      | 5.916   | 5.633   | 2.190                | 2.238                |
| $\text{Ta}_2\text{CF}_2$ | FCC     | -9.255                        | 0.016                                | 6.398   | 4.947   | 2.140                | 2.313                |
| $\text{Ta}_2\text{CF}_2$ | TOP     | -9.157                        |                                      | 6.200   | 6.320   | 2.201                | 1.878                |
| $\text{Cr}_2\text{CF}_2$ | HCP     | -7.621                        |                                      | 5.490   | 5.041   | 1.962                | 2.091                |
| $\text{Cr}_2\text{CF}_2$ | FCC     | -7.711                        | -0.089                               | 6.000   | 4.310   | 1.953                | 2.136                |
| $\text{Cr}_2\text{CF}_2$ | TOP     | -7.642                        |                                      | 5.837   | 5.465   | 1.963                | 1.726                |
| $\text{Mo}_2\text{CF}_2$ | HCP     | -8.176                        |                                      | 5.915   | 5.446   | 2.271                | 2.271                |
| $\text{Mo}_2\text{CF}_2$ | FCC     | -8.242                        | -0.066                               | 6.535   | 4.515   | 2.109                | 2.299                |
| $\text{Mo}_2\text{CF}_2$ | TOP     | -8.206                        |                                      | 6.169   | 6.024   | 2.117                | 1.867                |

Table S2. Formation energies ( $E_{f1}$  and  $E_{f2}$ , eV/atom) of  $M_2CF_2$  configurations relative to the combination of M, C and F elemental materials and the combination of bare  $M_2C$  MXene and F.

|            | $E_{tot}$ | $E_M$  | $E_C$ | $E_F$ | $E_{f1}$ | $E_{f2}$ |
|------------|-----------|--------|-------|-------|----------|----------|
| $Sc_2CF_2$ | -7.68     | -6.63  | -9.38 | -1.84 | -2.42    | -2.45    |
| $Y_2CF_2$  | -7.78     | -7.03  | -9.38 | -1.84 | -2.36    | -2.46    |
| $Ti_2CF_2$ | -8.08     | -12.30 | -9.38 | -1.84 | -0.56    | -2.24    |
| $Zr_2CF_2$ | -8.48     | -8.60  | -9.38 | -1.84 | -2.44    | -2.27    |
| $Hf_2CF_2$ | -10.32    | -14.19 | -9.38 | -1.84 | -2.04    | -2.26    |
| $V_2CF_2$  | -8.01     | -9.37  | -9.38 | -1.84 | -1.66    | -1.90    |
| $Nb_2CF_2$ | -8.60     | -10.86 | -9.38 | -1.84 | -1.65    | -1.94    |
| $Ta_2CF_2$ | -9.25     | -13.20 | -9.38 | -1.84 | -1.37    | -1.84    |
| $Cr_2CF_2$ | -7.71     | -10.02 | -9.38 | -1.84 | -1.10    | -1.61    |
| $Mo_2CF_2$ | -8.24     | -11.58 | -9.38 | -1.84 | -1.01    | -1.61    |

Table S3. Calculated total energy differences (eV/atom) of ZXY-M<sub>2</sub>CF<sub>2</sub>Li<sub>4</sub> configurations to the most stable configuration.

| ZXY | M=Sc  | Y     | Ti    | Zr    | Hf    | V     | Nb    | Ta    |
|-----|-------|-------|-------|-------|-------|-------|-------|-------|
| HHH | 0.124 | 0.105 | 0.285 | 0.245 | 0.328 | 0.469 | 0.458 | 0.577 |
| FHH | 0.093 | 0.063 | 0.263 | 0.212 | 0.297 | 0.453 | 0.433 | 0.553 |
| THH | 0.093 | 0.062 | 0.263 | 0.212 | 0.297 | 0.453 | 0.433 | 0.553 |
| HHF | 0.038 | 0.032 | 0.035 | 0.013 | 0.016 | 0.026 | 0.041 | 0.042 |
| FHF | 0.066 | 0.069 | 0.117 | 0.114 | 0.134 | 0.131 | 0.124 | 0.142 |
| THF | 0.005 | 0.044 | 0.013 | 0.005 | 0.006 | 0.010 | 0.017 | 0.021 |
| HHT | 0.034 | 0.032 | 0.025 | 0.013 | 0.036 | 0.017 | 0.030 | 0.030 |
| FHT | 0     | 0.017 | 0     | 0     | 0     | 0     | 0.003 | 0.006 |
| THT | 0.063 | 0.064 | 0.108 | 0.101 | 0.110 | 0.115 | 0.102 | 0.113 |
| HFH | 0.067 | 0.072 | 0.118 | 0.115 | 0.132 | 0.128 | 0.119 | 0.137 |
| FFH | 0.040 | 0.039 | 0.036 | 0.022 | 0.065 | 0.028 | 0.039 | 0.038 |
| TFH | 0.008 | 0.047 | 0.014 | 0.013 | 0.032 | 0.013 | 0.015 | 0.016 |
| HFF | 0.012 | 0.000 | 0.211 | 0.187 | 0.273 | 0.398 | 0.412 | --    |
| FFF | 0.047 | 0.048 | 0.238 | 0.224 | 0.313 | 0.421 | --    | --    |
| TFF | 0.012 | 0     | 0.211 | 0.187 | 0.274 | 0.398 | 0.412 | --    |
| HFT | 0.009 | 0.021 | 0.003 | 0.009 | 0.004 | 0.003 | 0     | 0     |
| FFT | 0.077 | 0.039 | 0.027 | 0.015 | 0.052 | 0.019 | 0.027 | 0.024 |
| TFT | 0.053 | 0.066 | 0.179 | 0.102 | 0.139 | 0.114 | 0.099 | 0.110 |
| HTH | 0.079 | 0.083 | 0.140 | 0.154 | 0.173 | 0.157 | 0.157 | 0.190 |
| FTH | 0.079 | 0.069 | 0.040 | --    | 0.090 | 0.048 | 0.062 | 0.094 |
| TTH | 0.060 | --    | 0.063 | 0.148 | 0.120 | 0.063 | 0.086 | 0.115 |
| HTF | 0.028 | 0.068 | 0.041 | --    | 0.090 | 0.049 | 0.062 | 0.093 |
| FTF | 0.079 | 0.083 | 0.139 | 0.154 | 0.173 | 0.158 | 0.159 | 0.192 |
| TTF | 0.061 | --    | 0.063 | 0.148 | --    | 0.064 | 0.086 | 0.115 |
| HTT | 0.149 | 0.164 | 0.284 | 0.262 | 0.306 | 0.394 | 0.384 | 0.447 |
| FTT | 0.149 | 0.164 | 0.284 | 0.262 | 0.306 | 0.394 | 0.384 | 0.447 |
| TTT | 0.183 | 0.180 | 0.308 | 0.293 | 0.336 | 0.412 | 0.408 | 0.469 |

X=Li site, Y=F site, Z=Li site; H=HCP site, F=FCC site, T=TOP site.

--" means that structural relaxation does not converge.

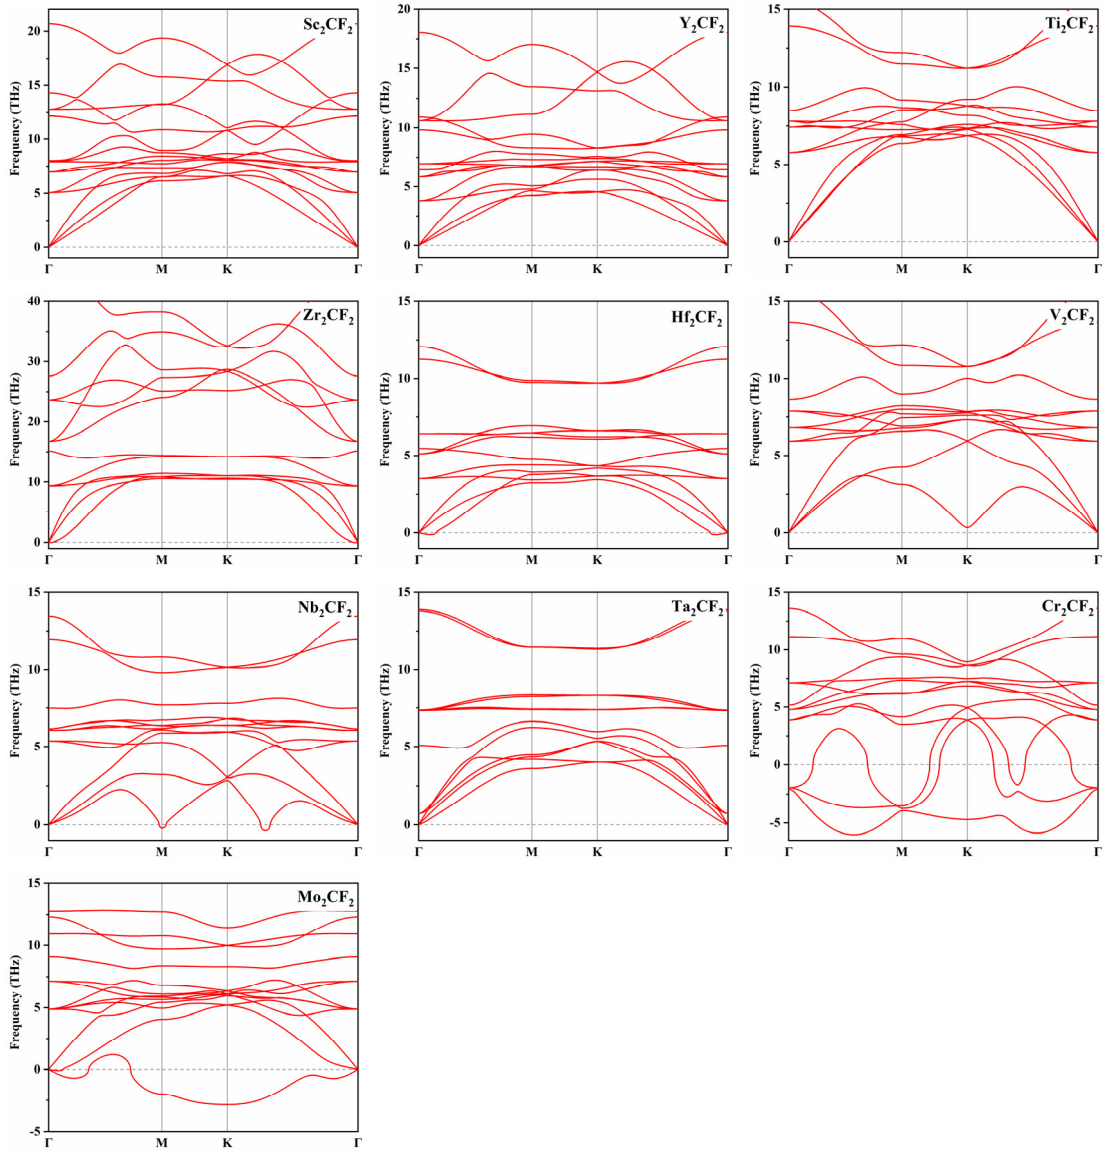

Fig. S1. Phonon dispersions of the most stable  $M_2CF_2$  configurations.

Notes: Only a little imaginary frequencies exist for the  $Nb_2CF_2$ , which attribute to the inadequate supercell for phonon calculation.

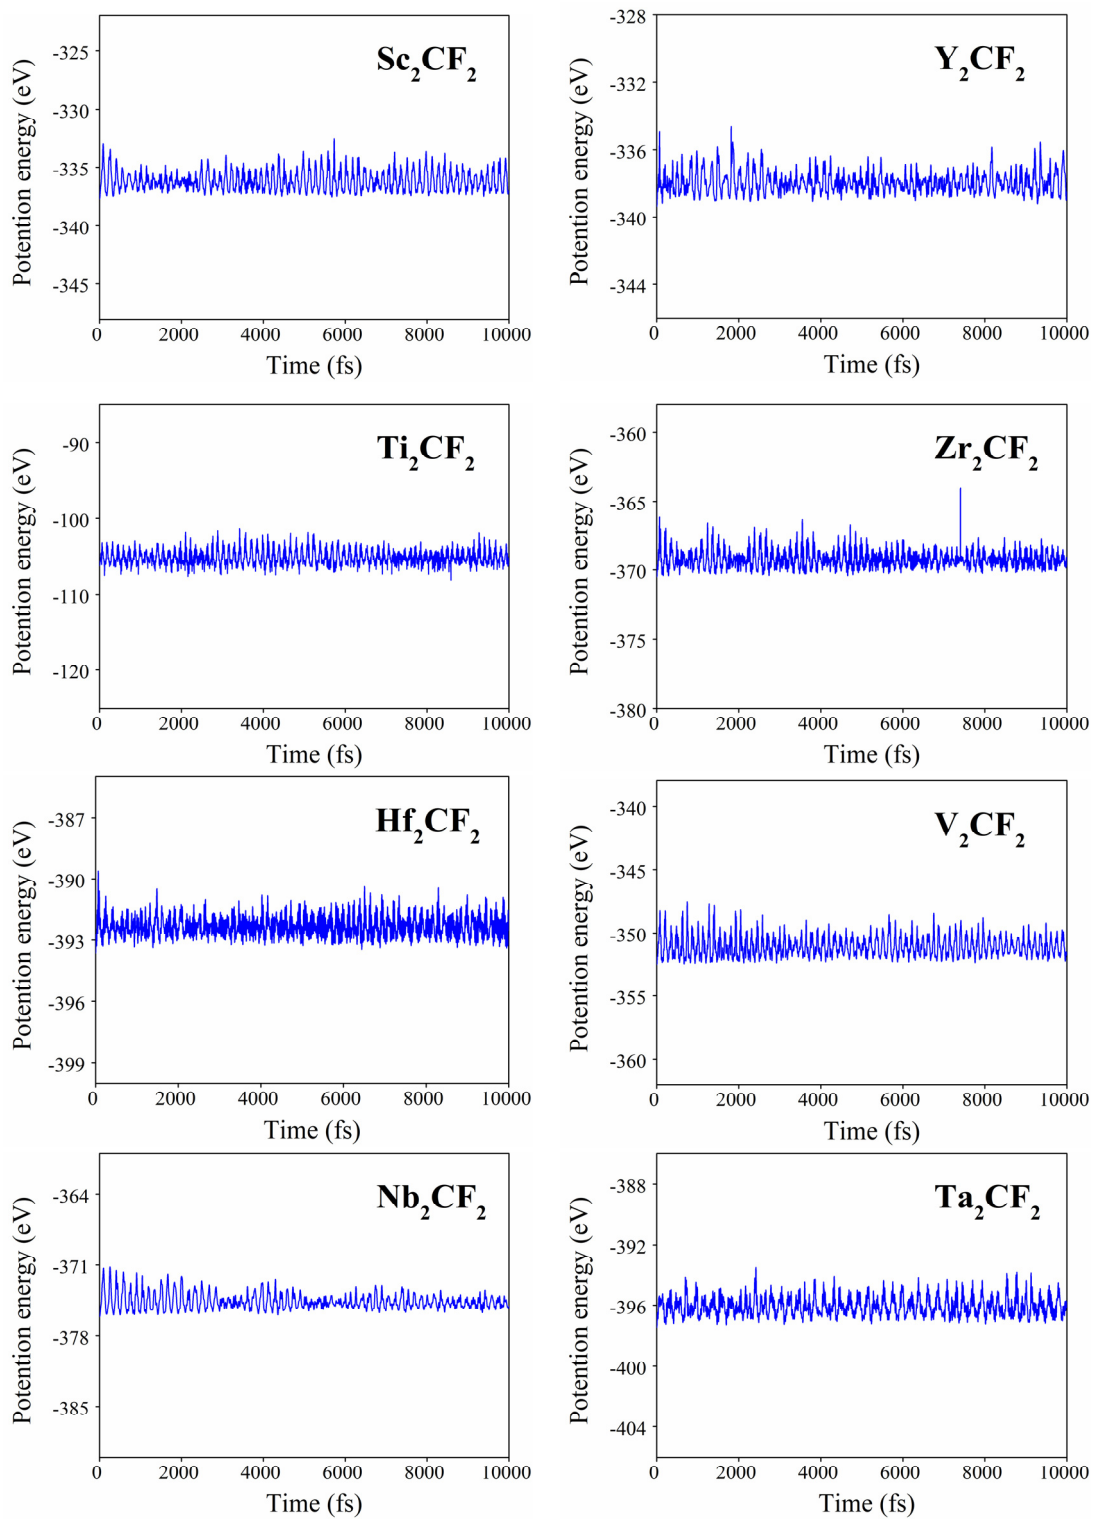

Fig. S2. Potential energy profiles of different  $M_2CF_2$  configurations during the AIMD simulations.

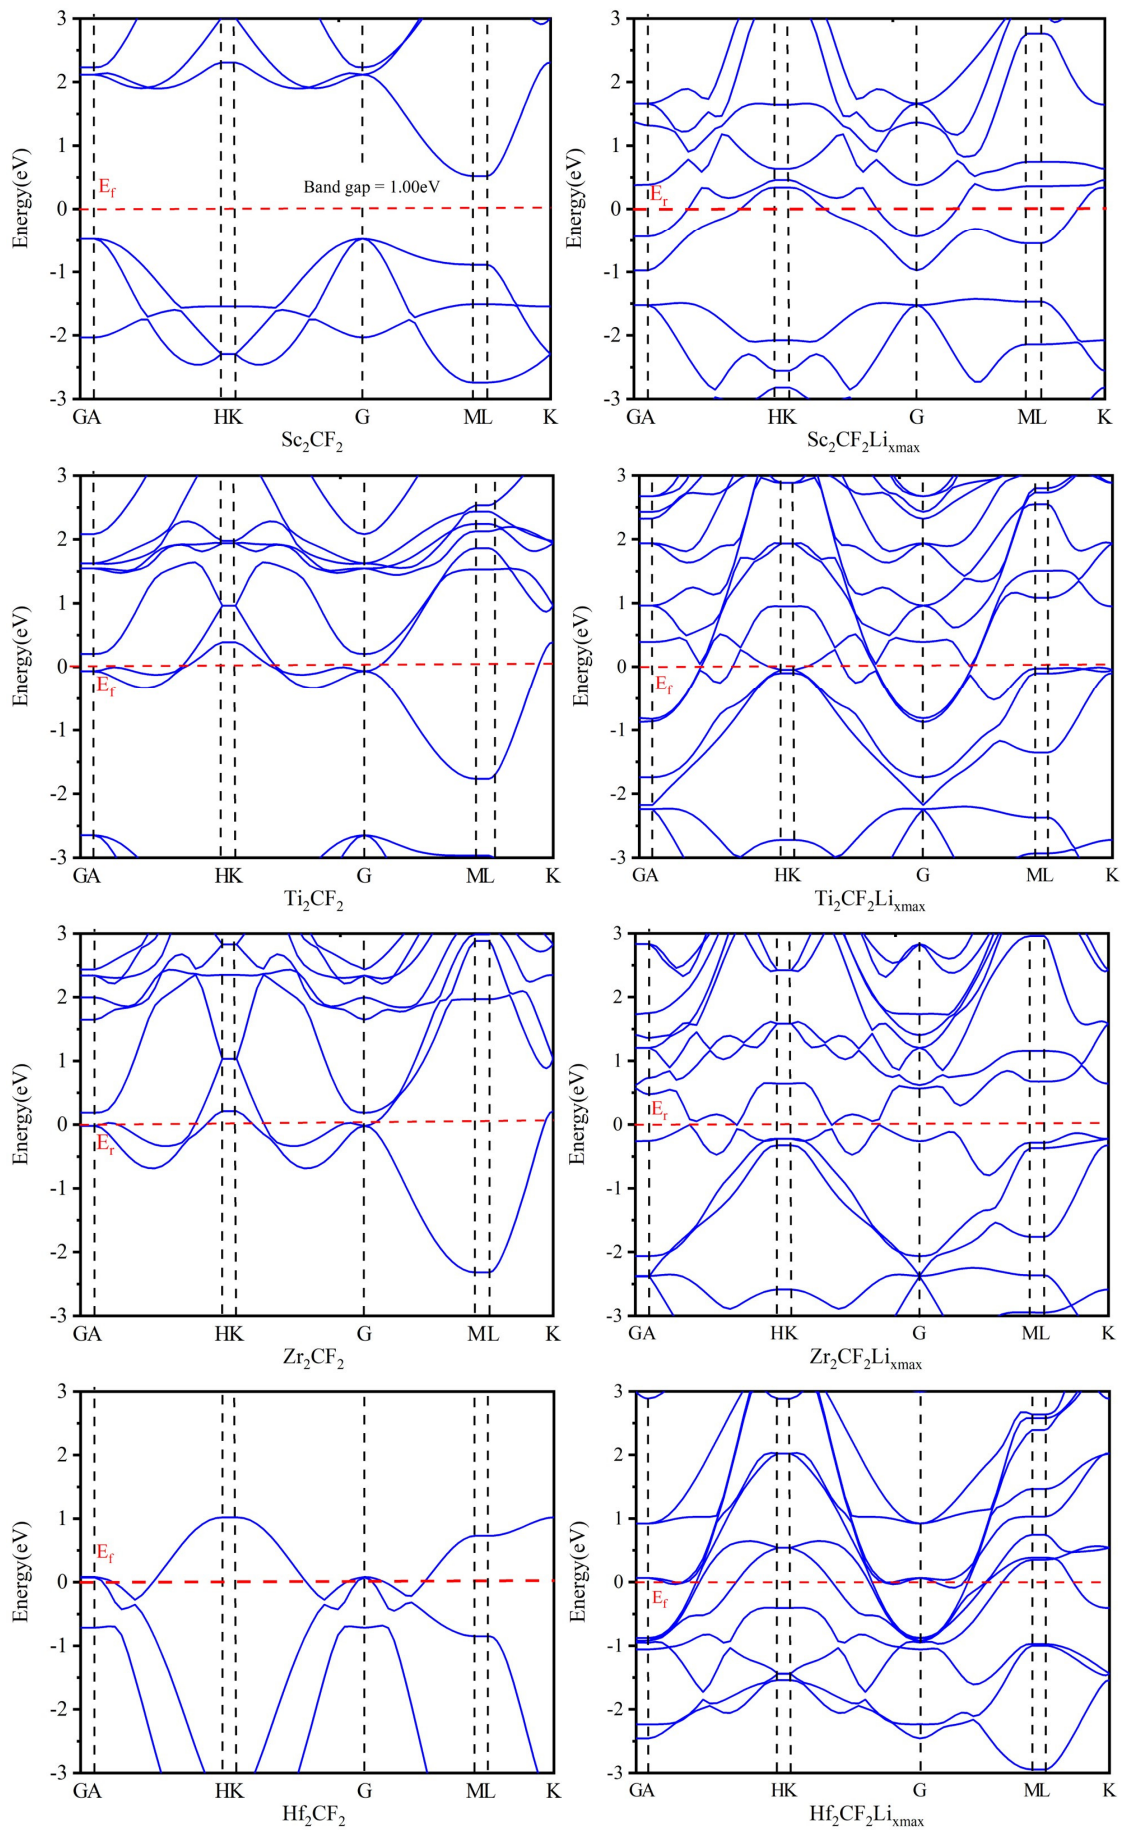

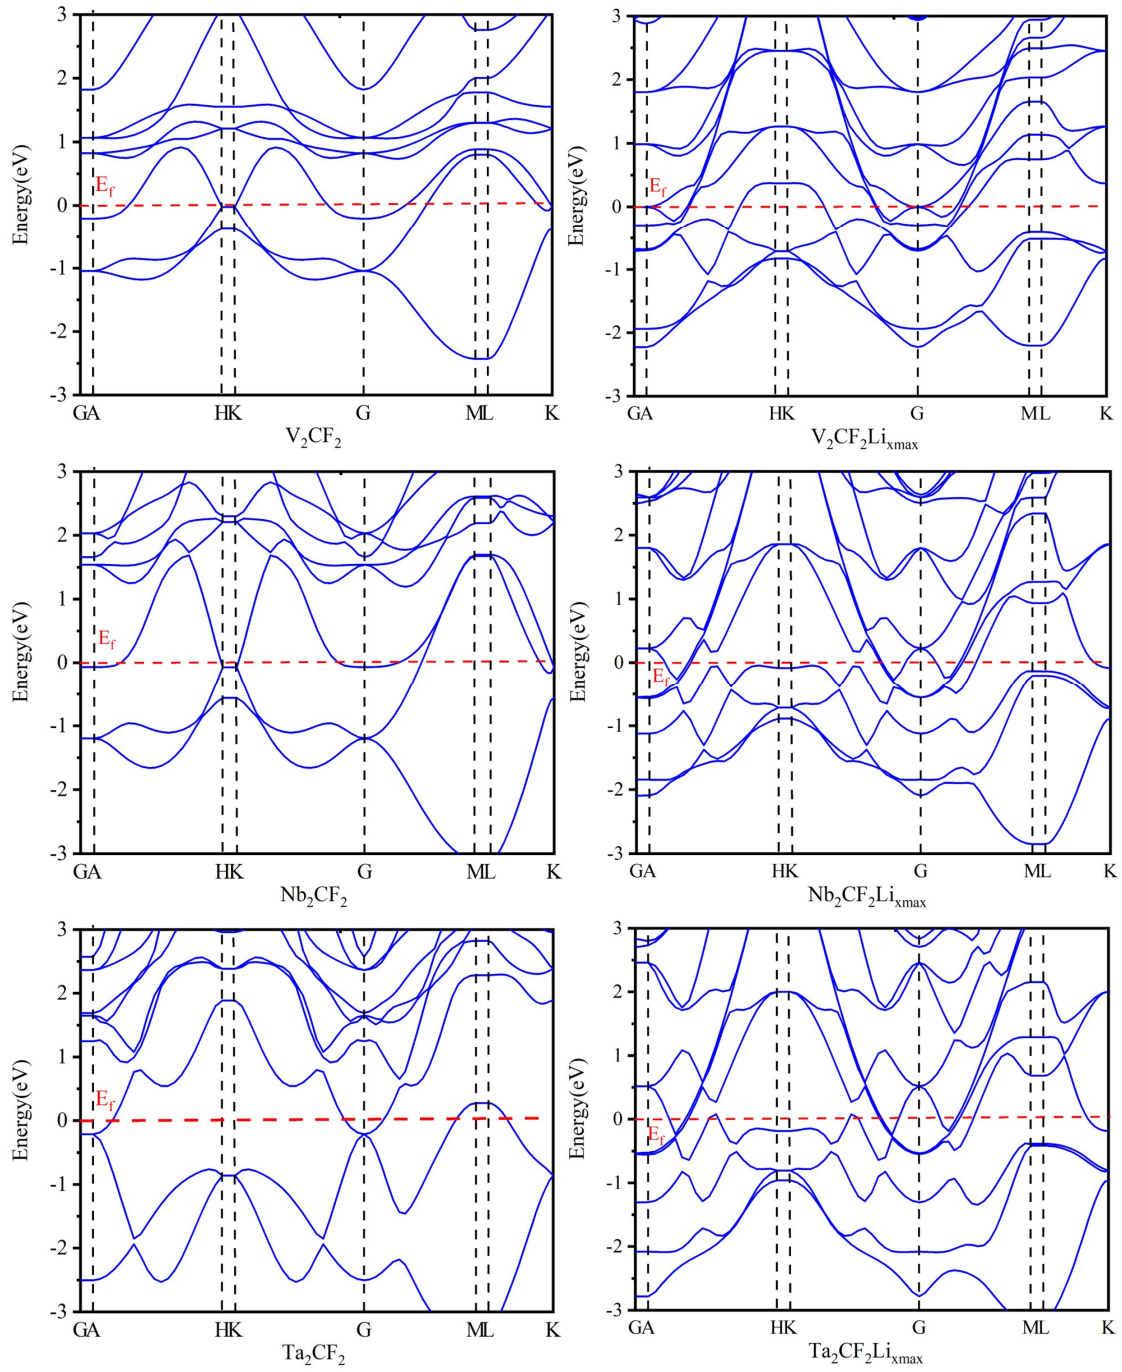

Fig. S3. Band structures of different MXenes before and after lithiation. Xmax indicates the maximum Li content.

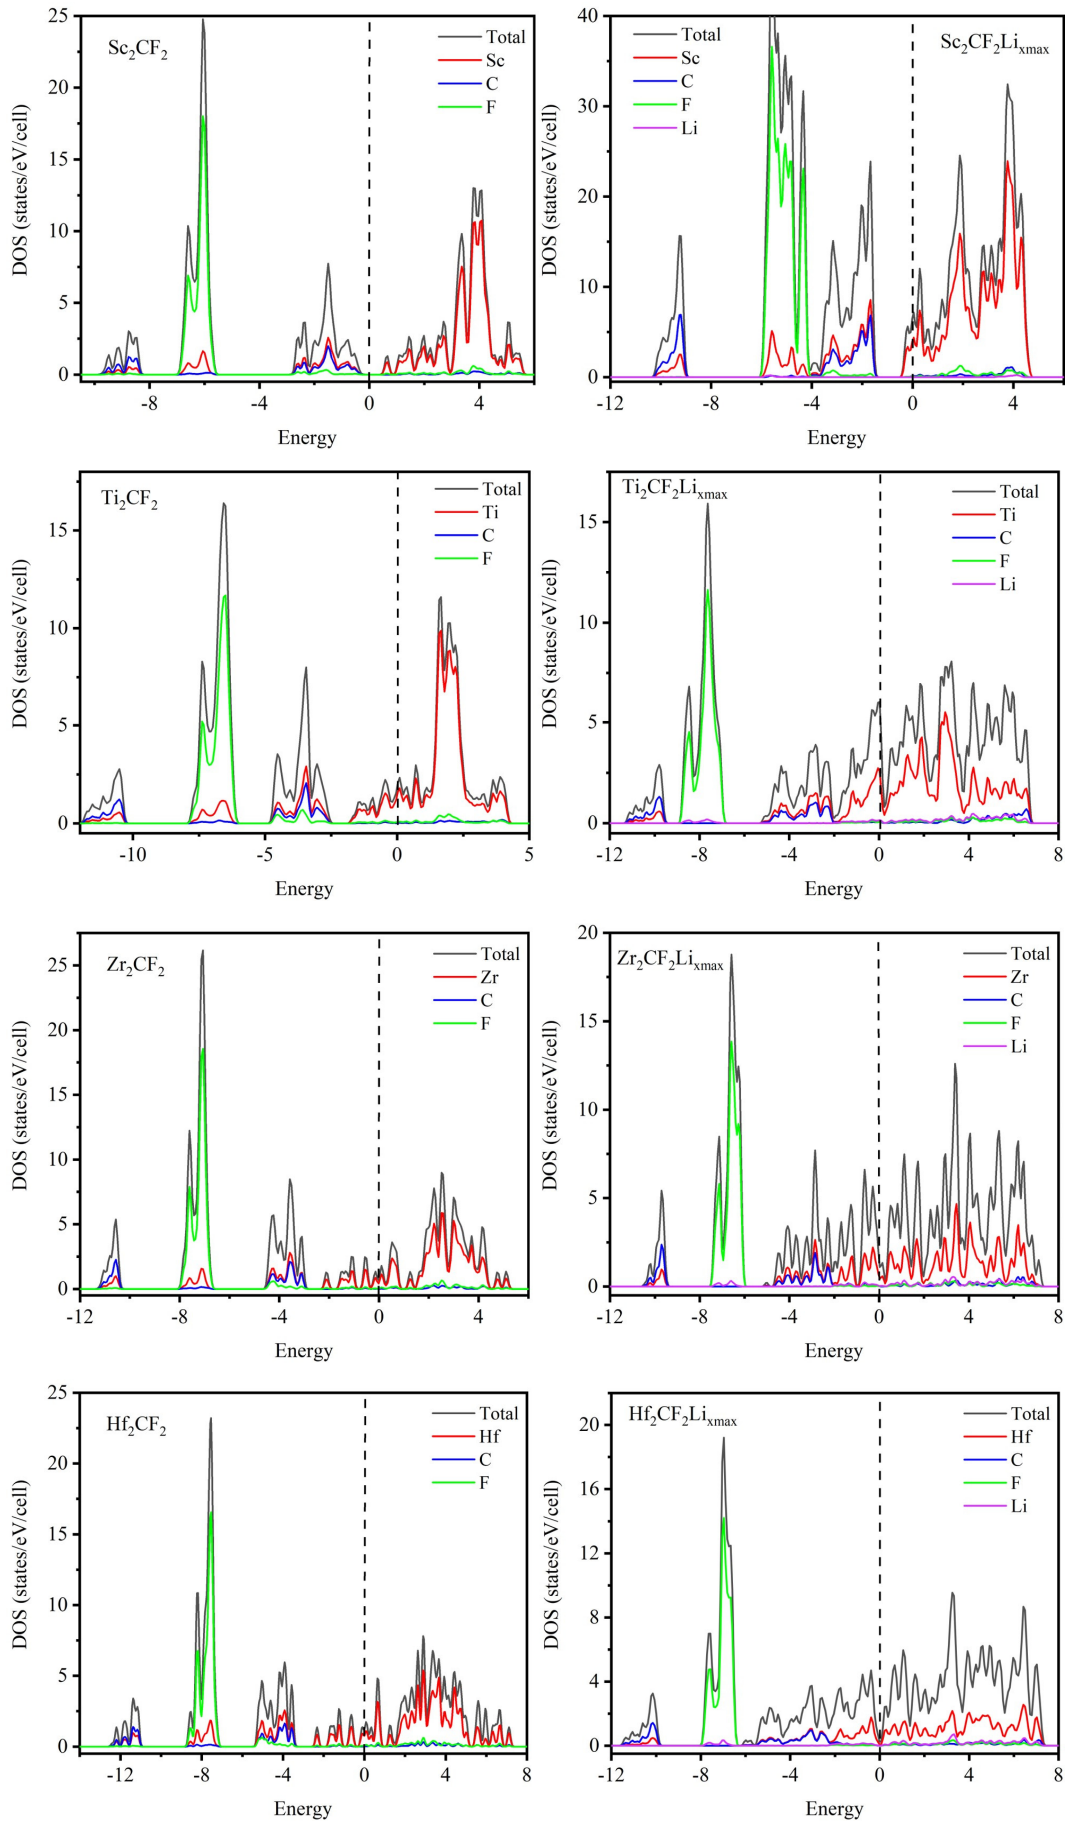



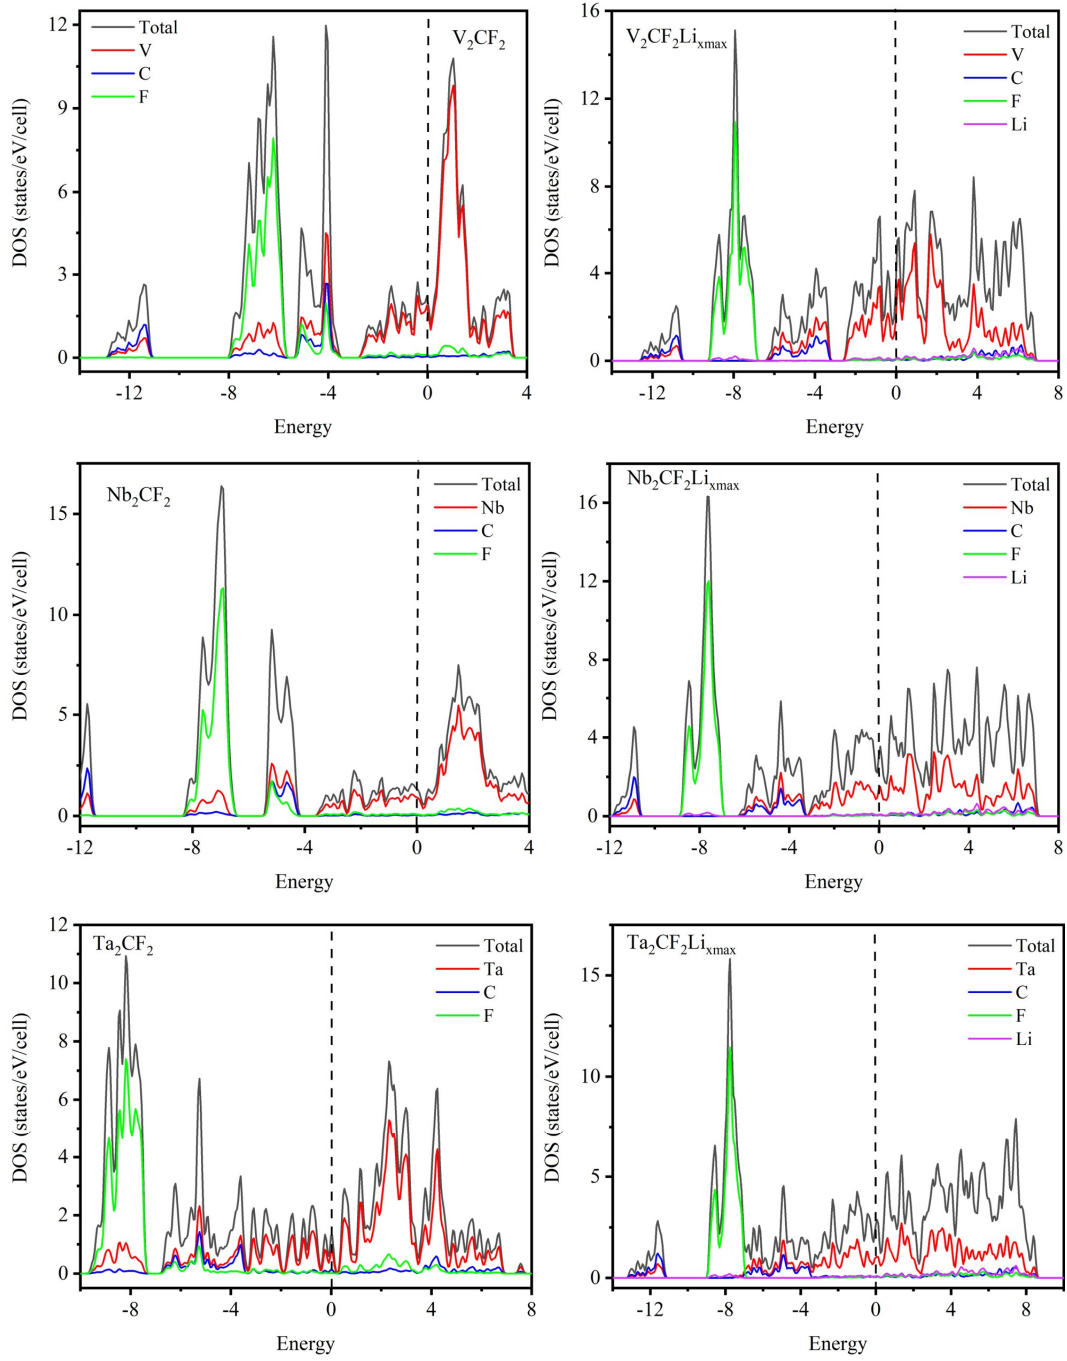

Fig. S4. Density of states of different MXenes before and after lithiation. Xmax indicates the maximum Li content.
